# Supplementary material for: Mitochondrial dysfunction abrogates dietary lipid processing in enterocytes
Source: PubMed Central journal article supplement (PMC10781618; doi:10.1038/s41586-023-06857-0), 2023-12-20
Supplement: 41586_2023_6857_MOESM1_ESM.pdf [file 41586_2023_6857_MOESM1_ESM.pdf]

## Supplementary information

---

# Mitochondrial dysfunction abrogates dietary lipid processing in enterocytes

---

In the format provided by the  
authors and unedited

# Supplementary Figure 1

## Figure 1c

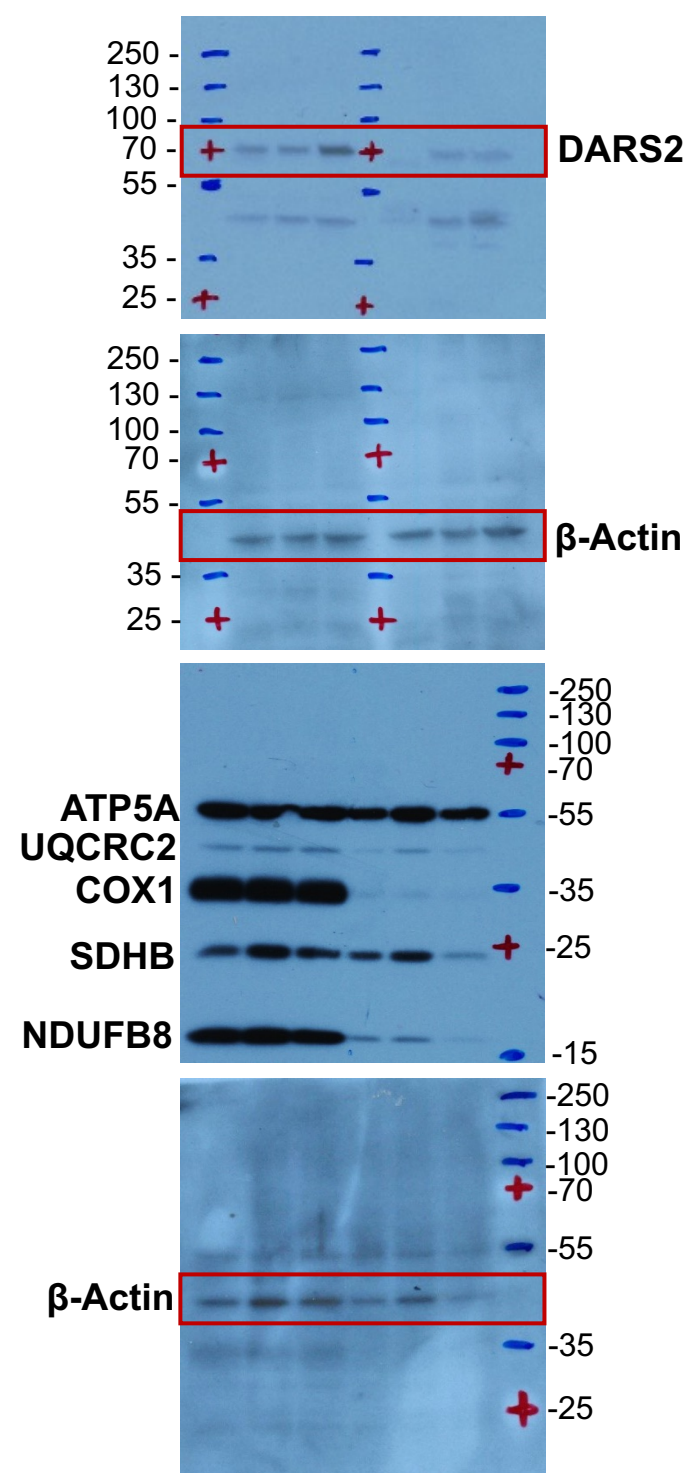

## Figure 2b

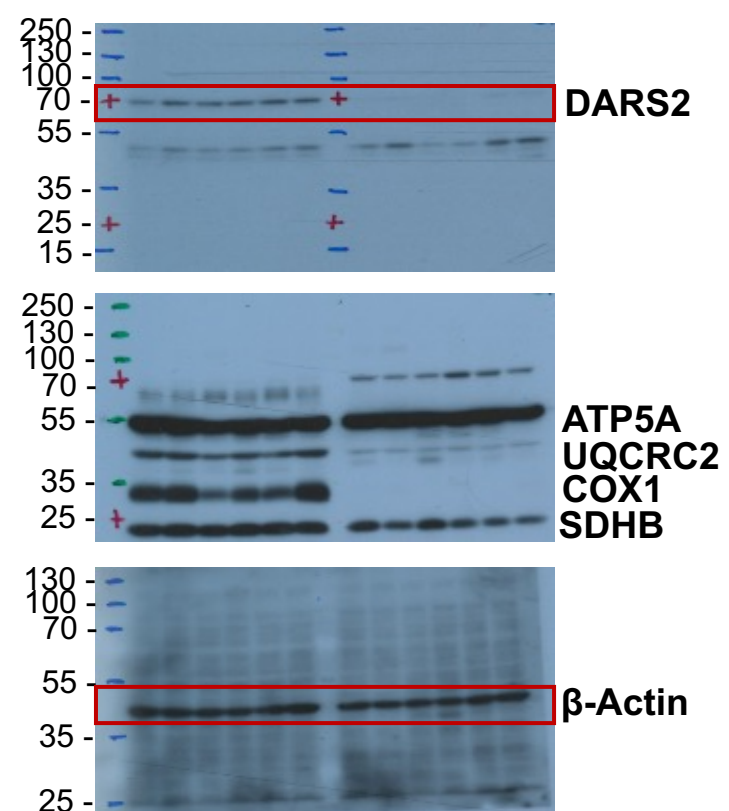

## Figure 4a

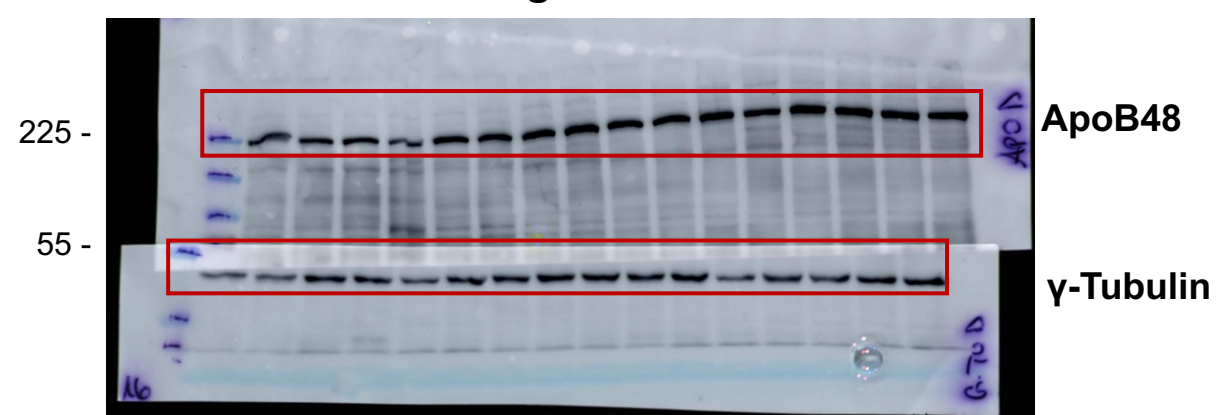

## Figure 4b

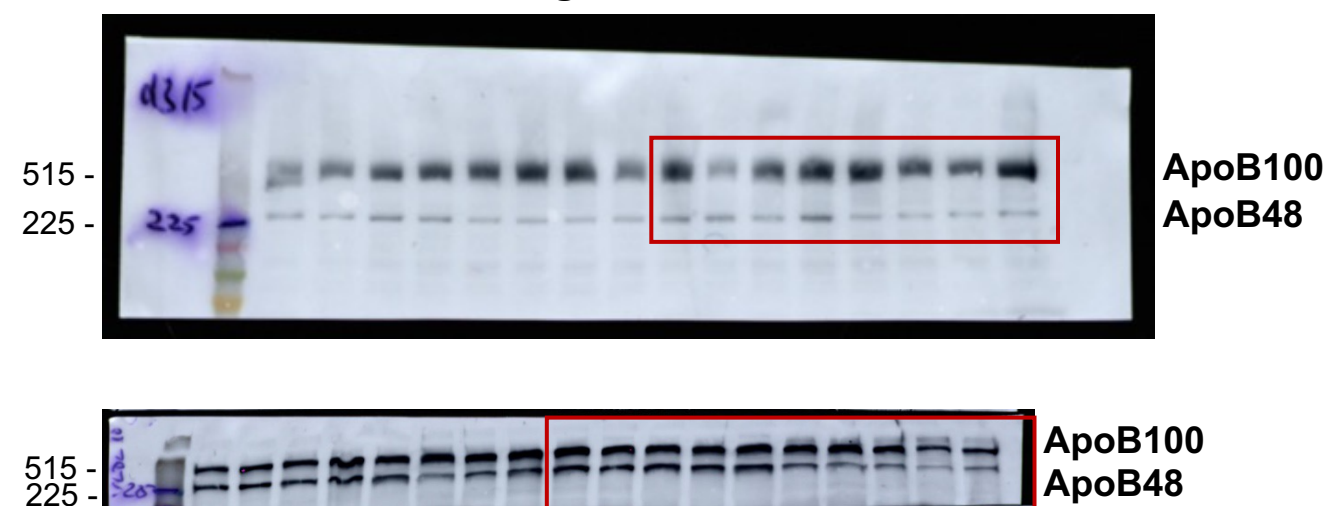

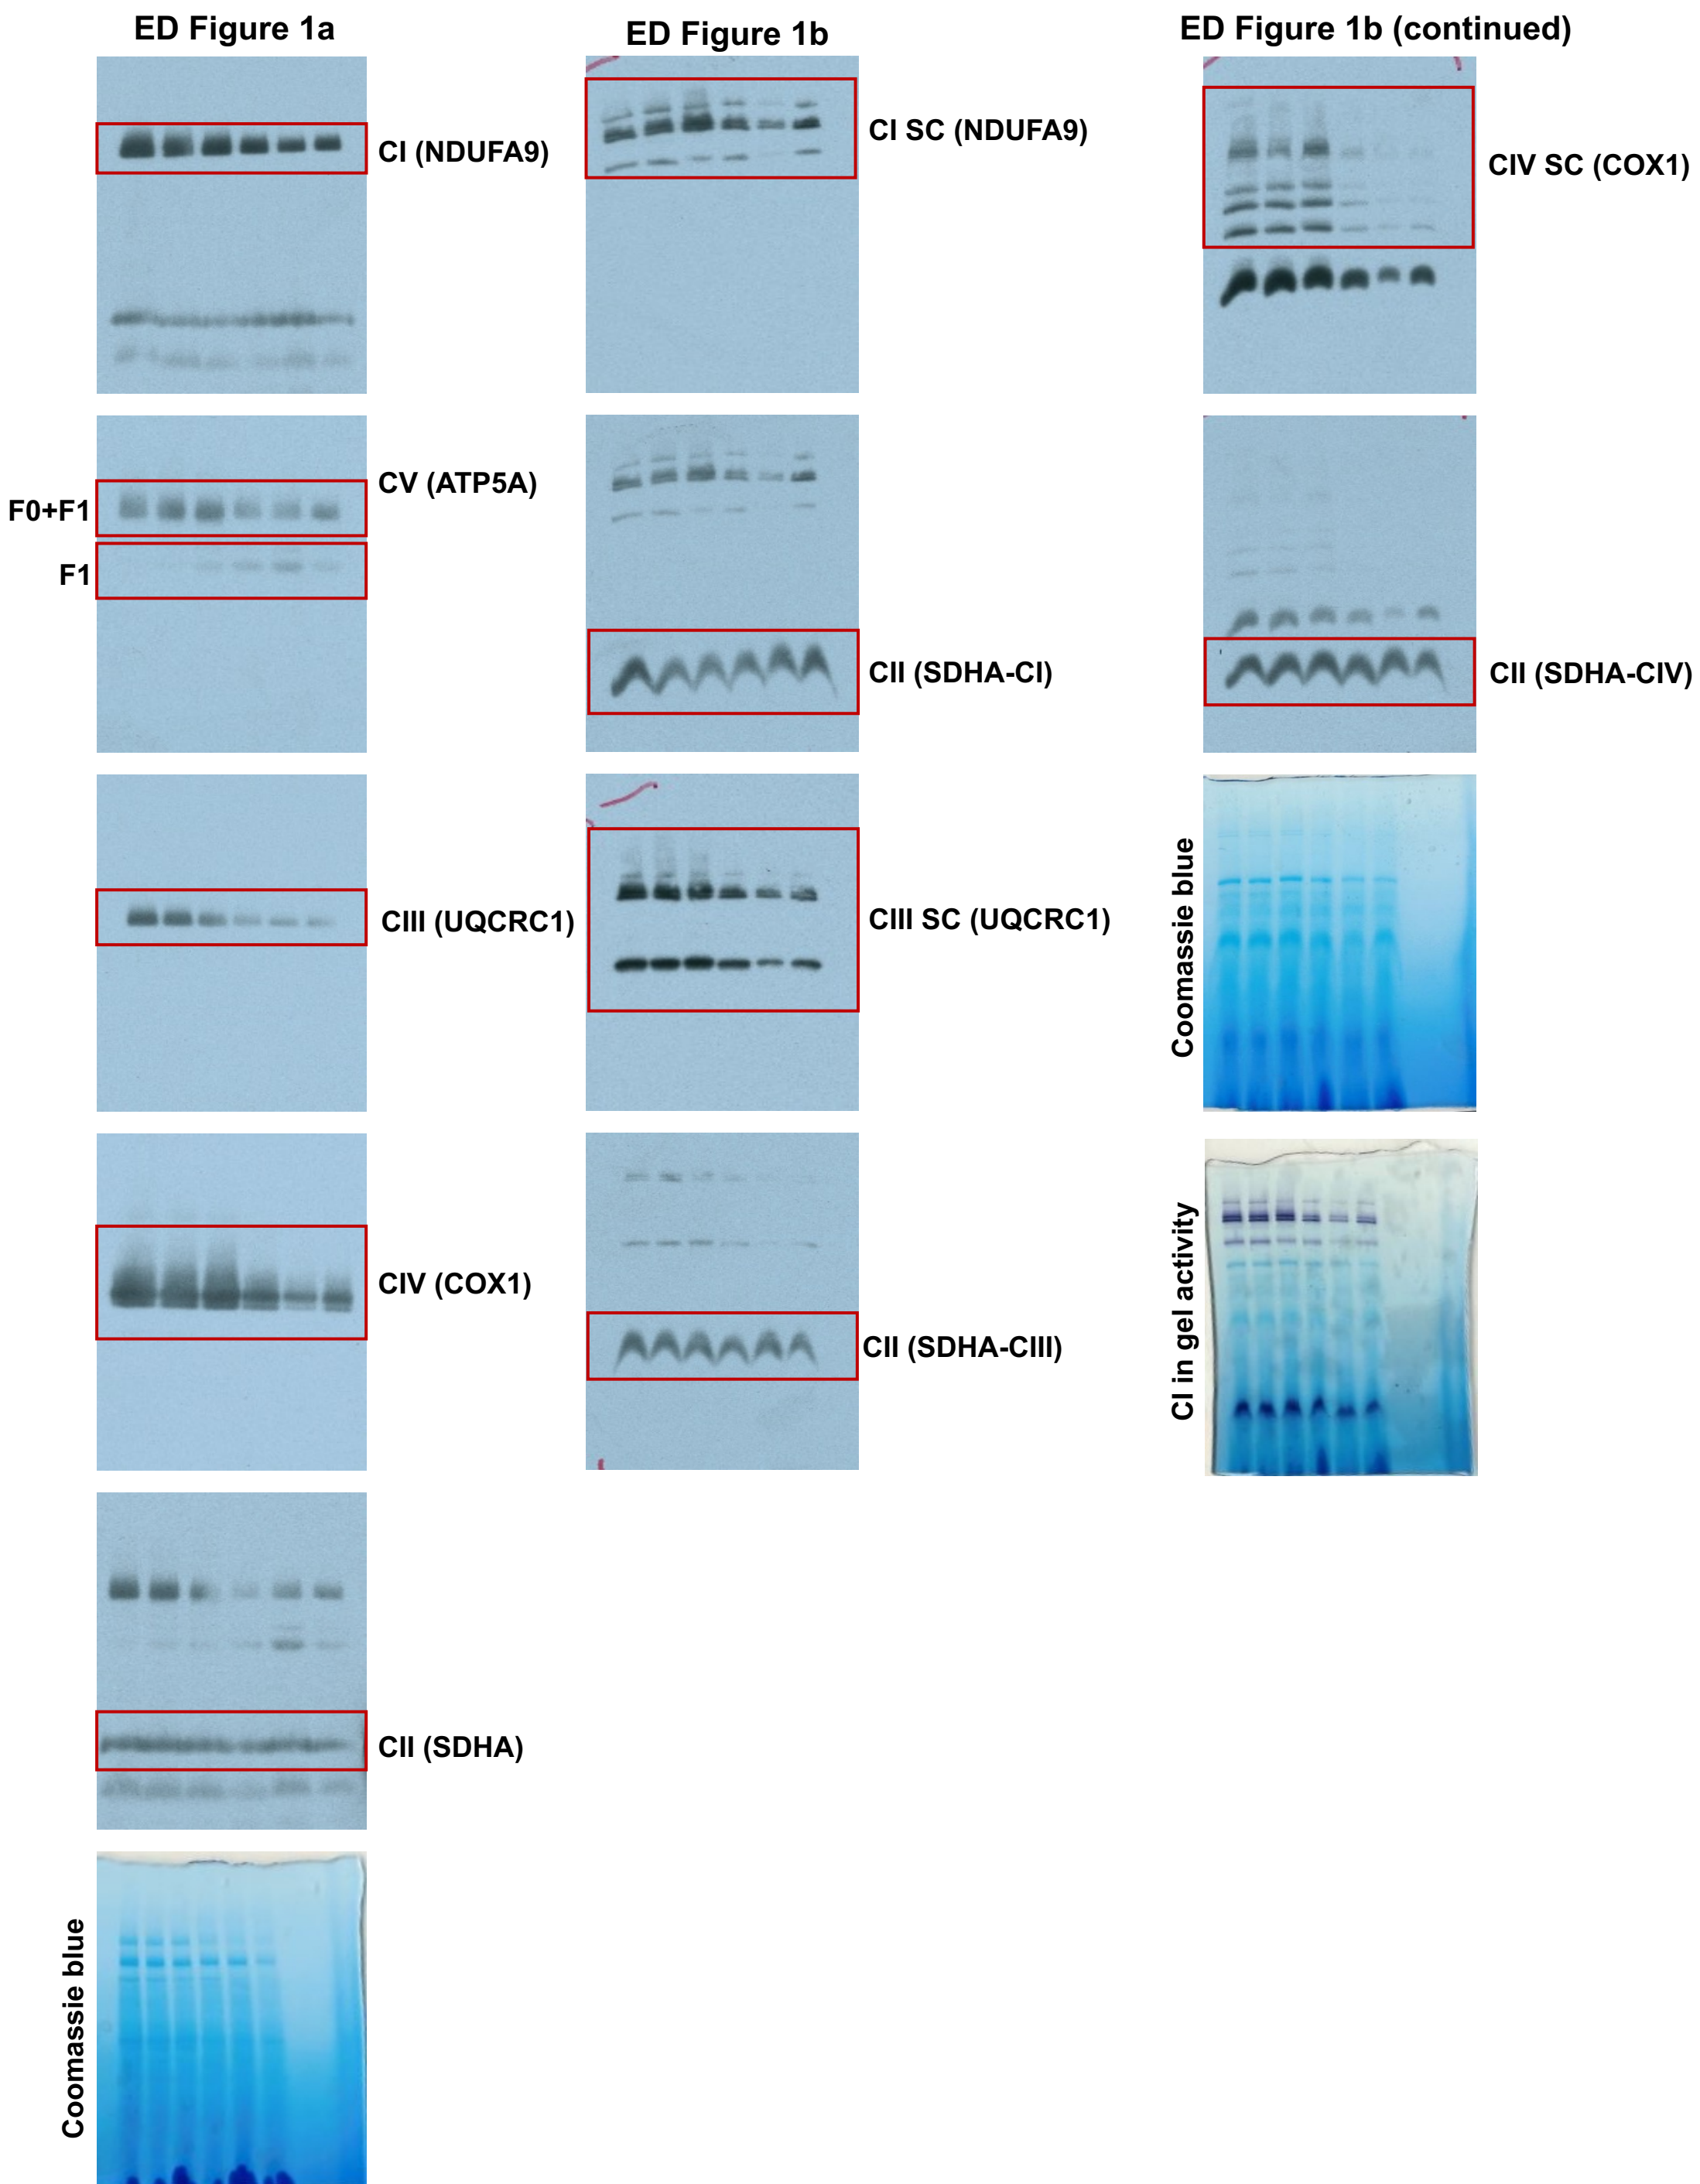

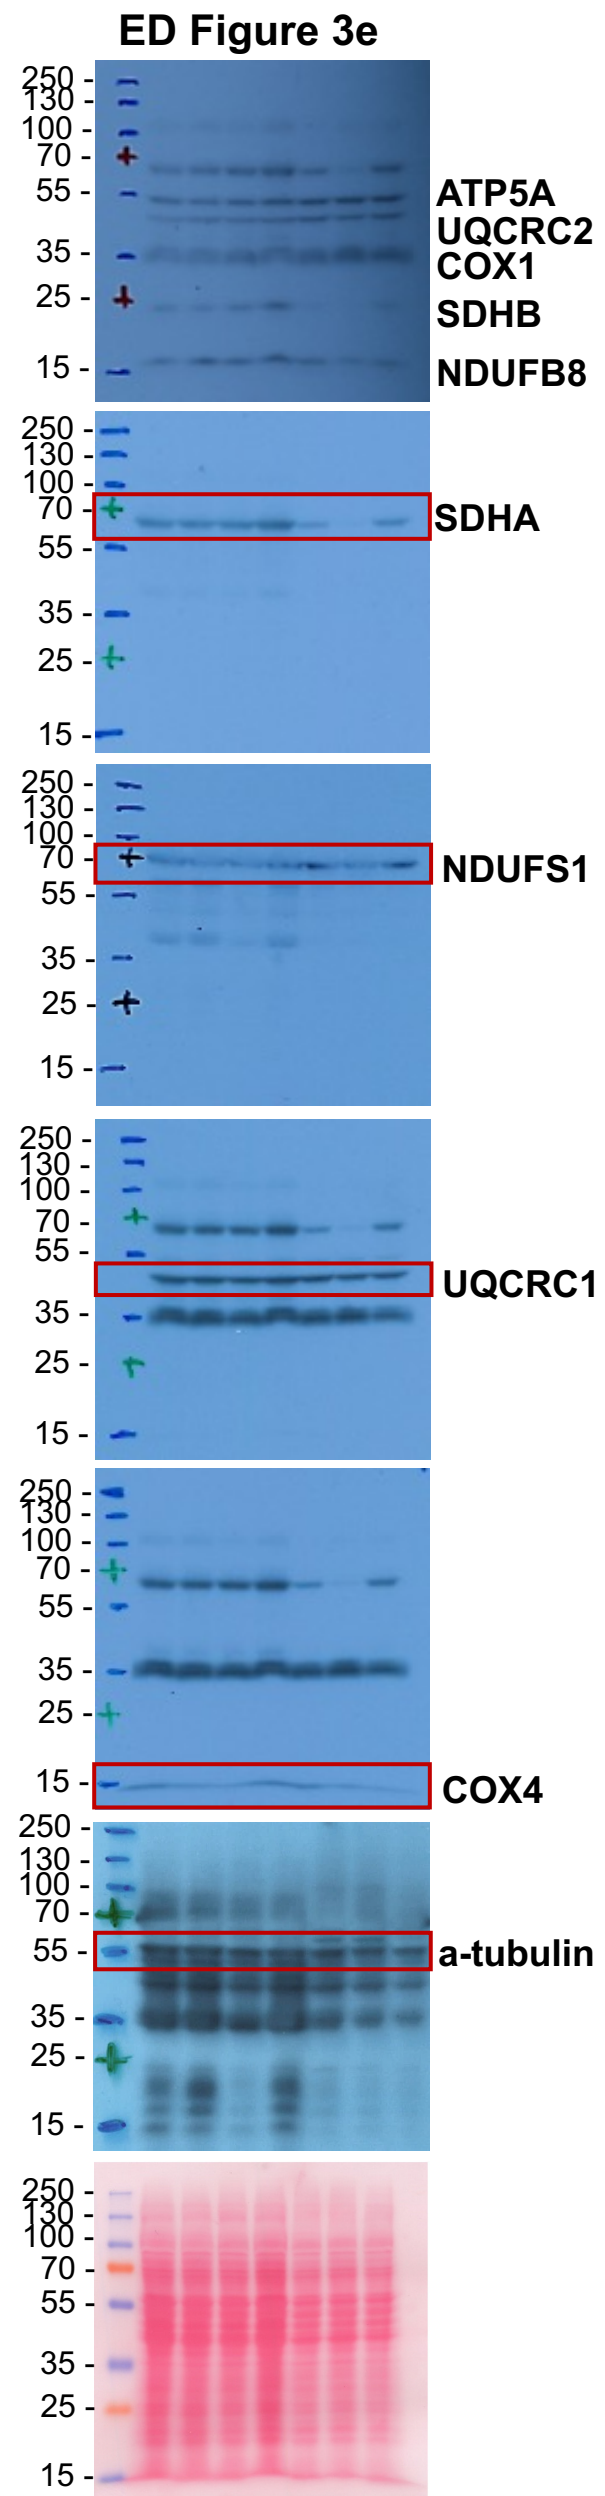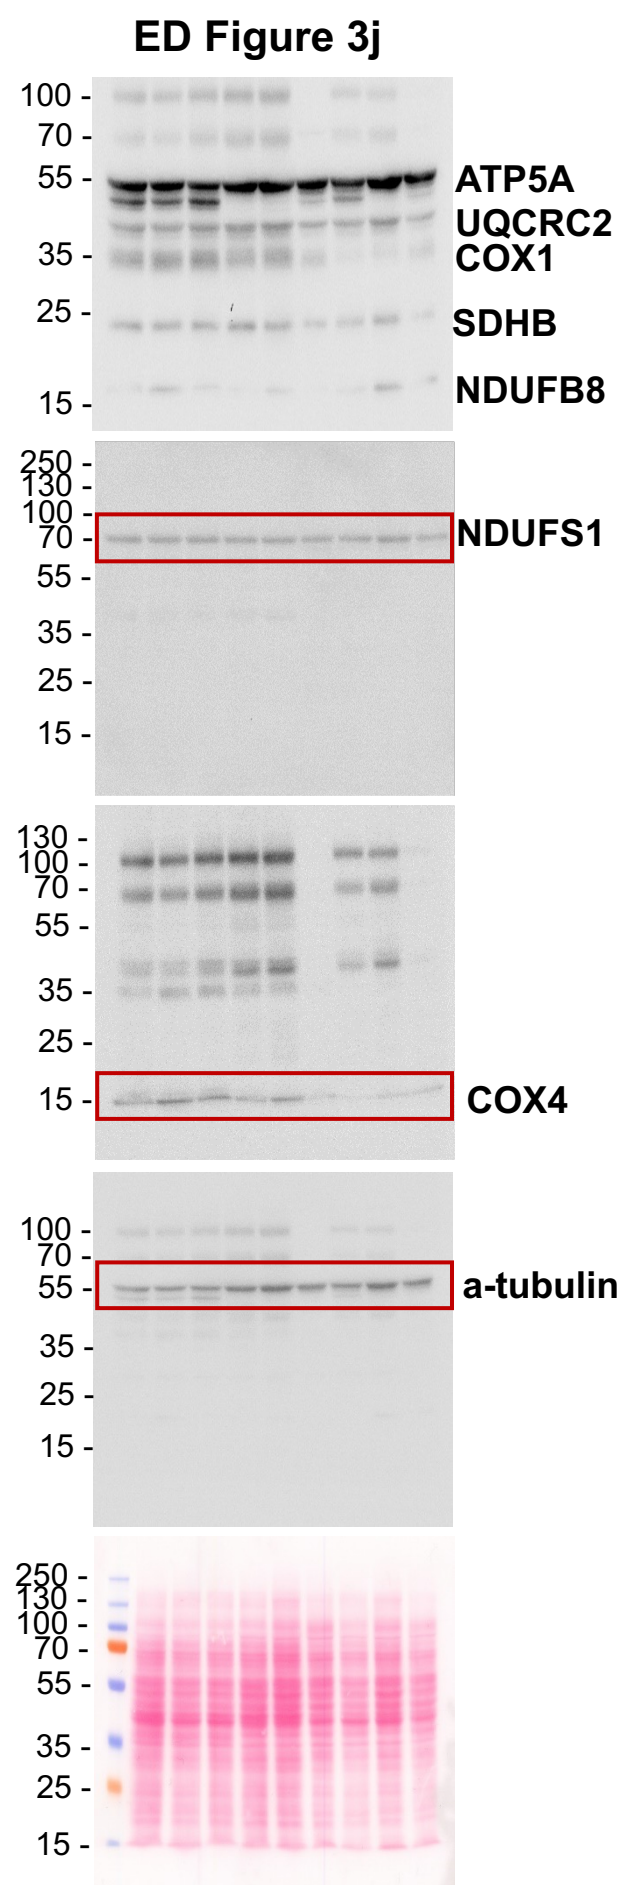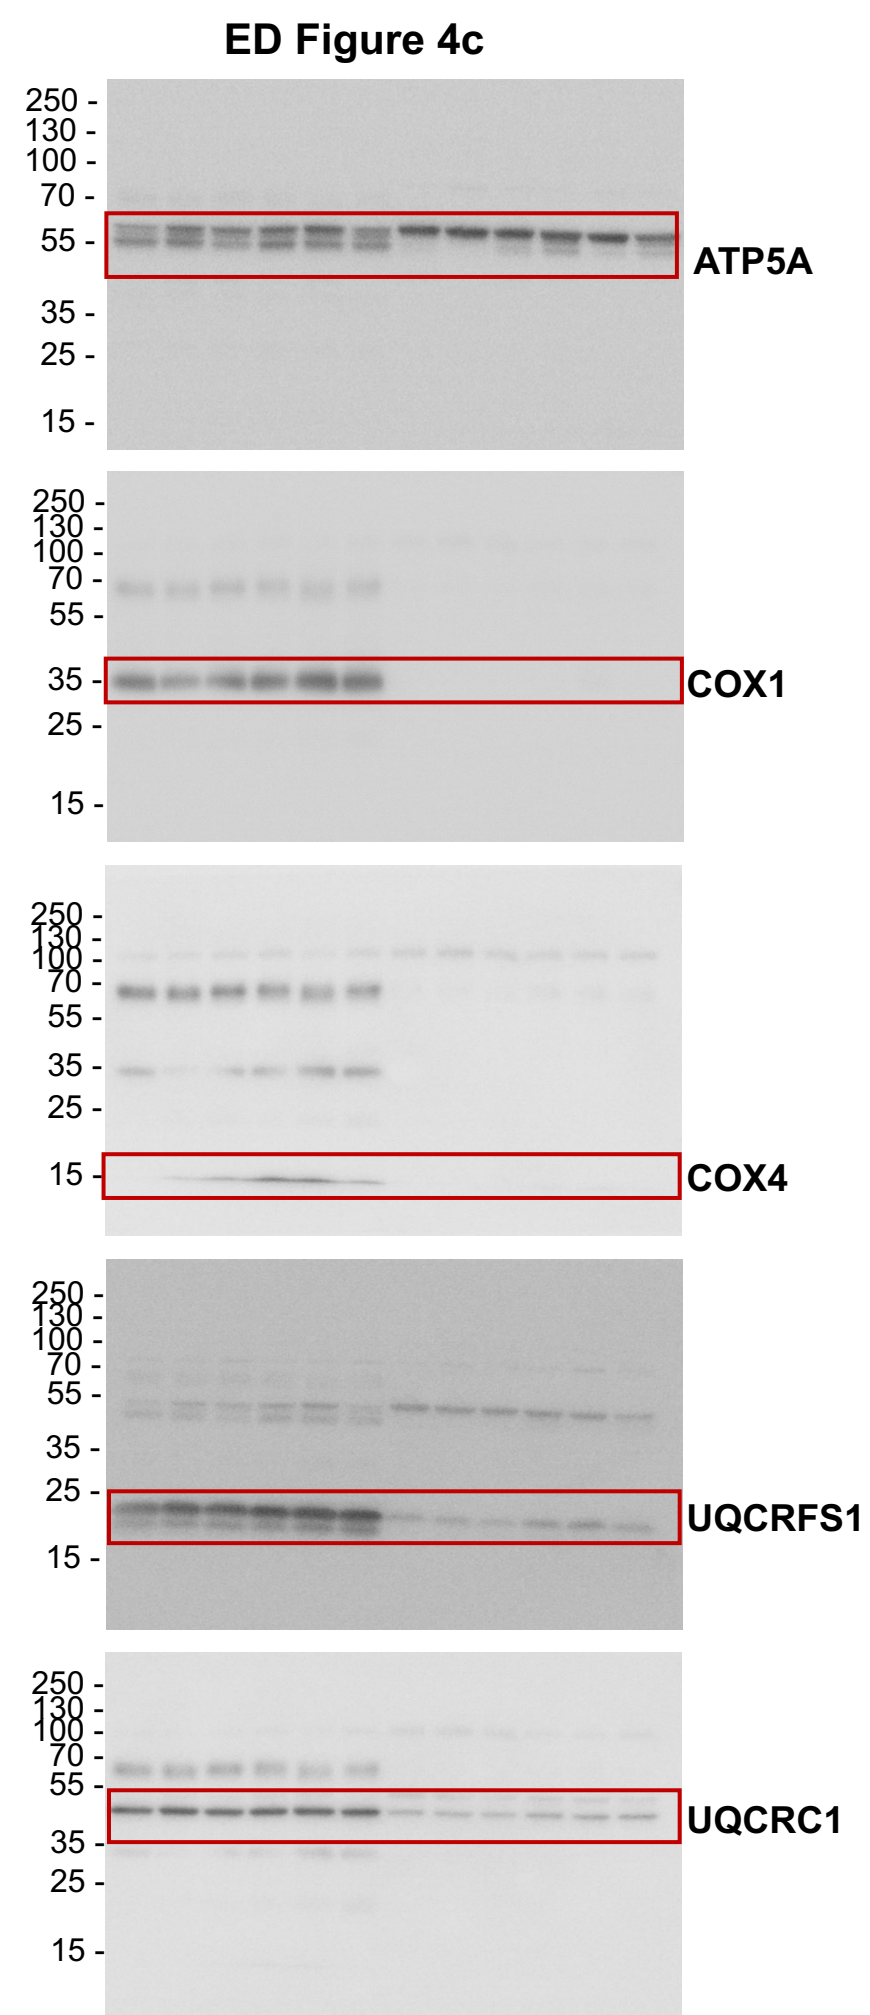

Supplementary Figure 1 (continued)

ED Figure 4c (continued)

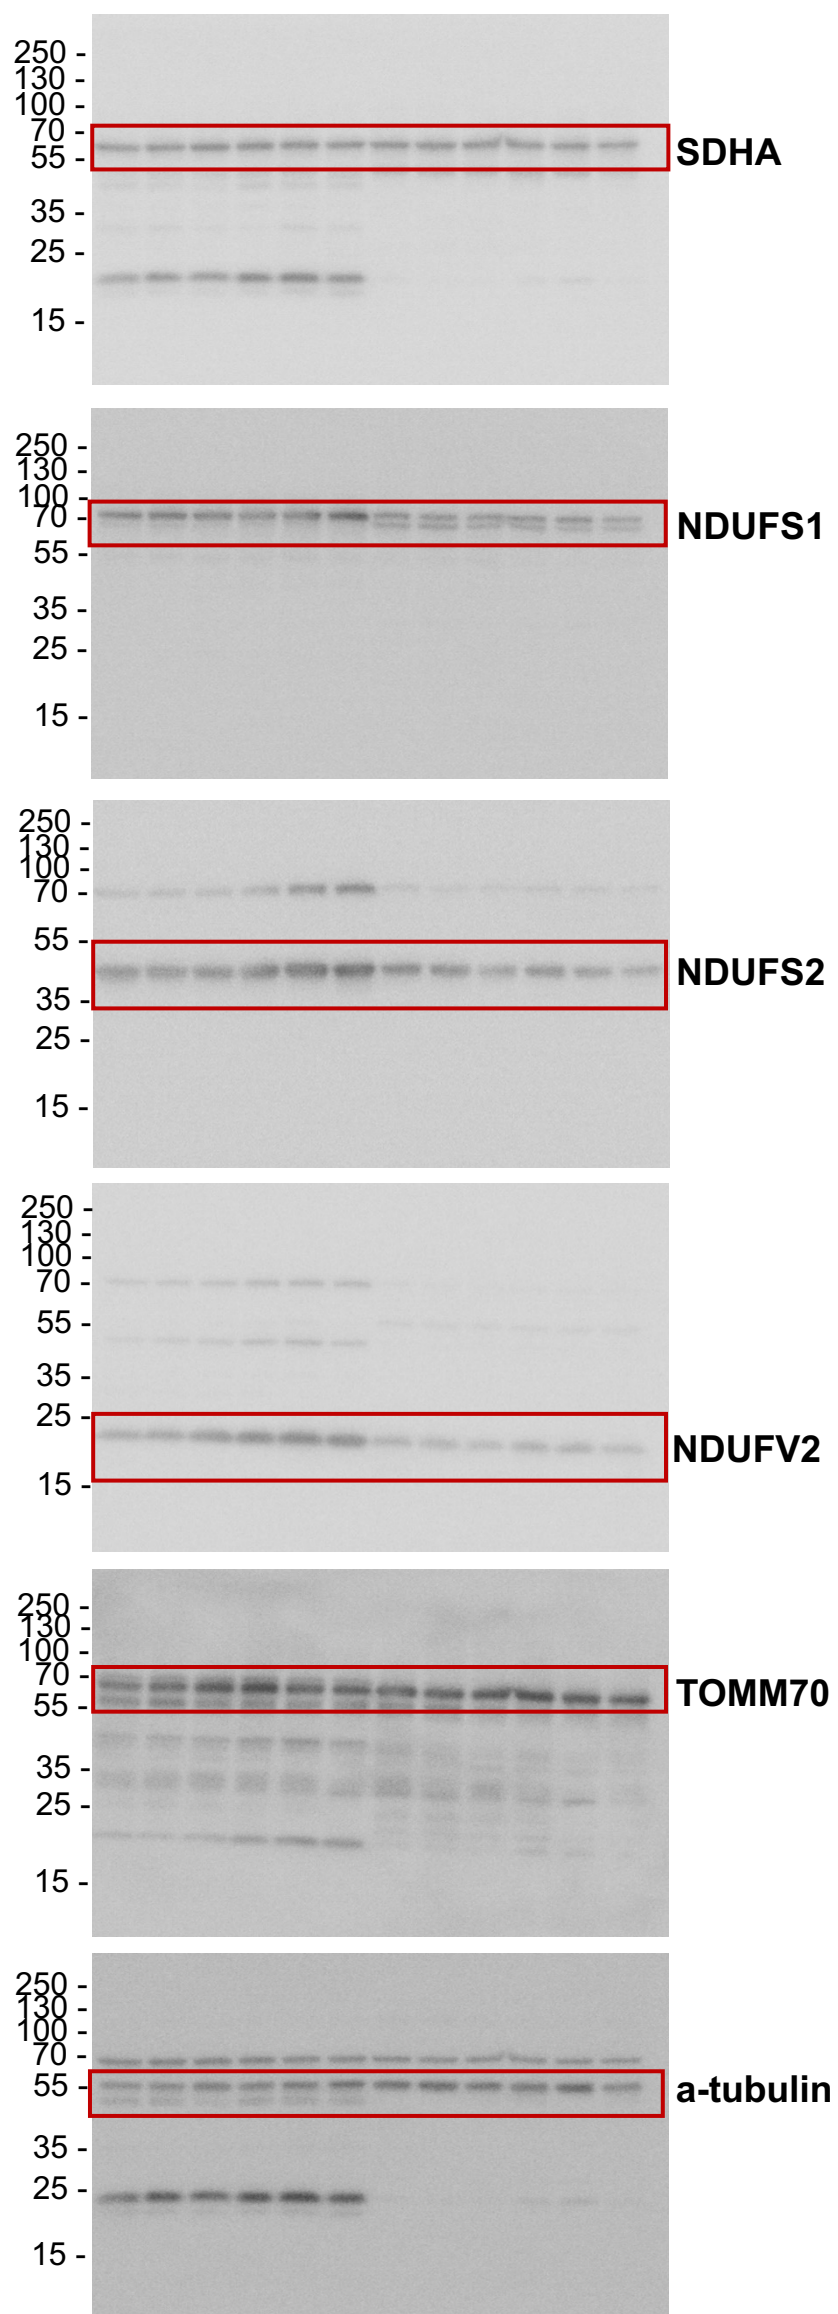

ED Figure 5b

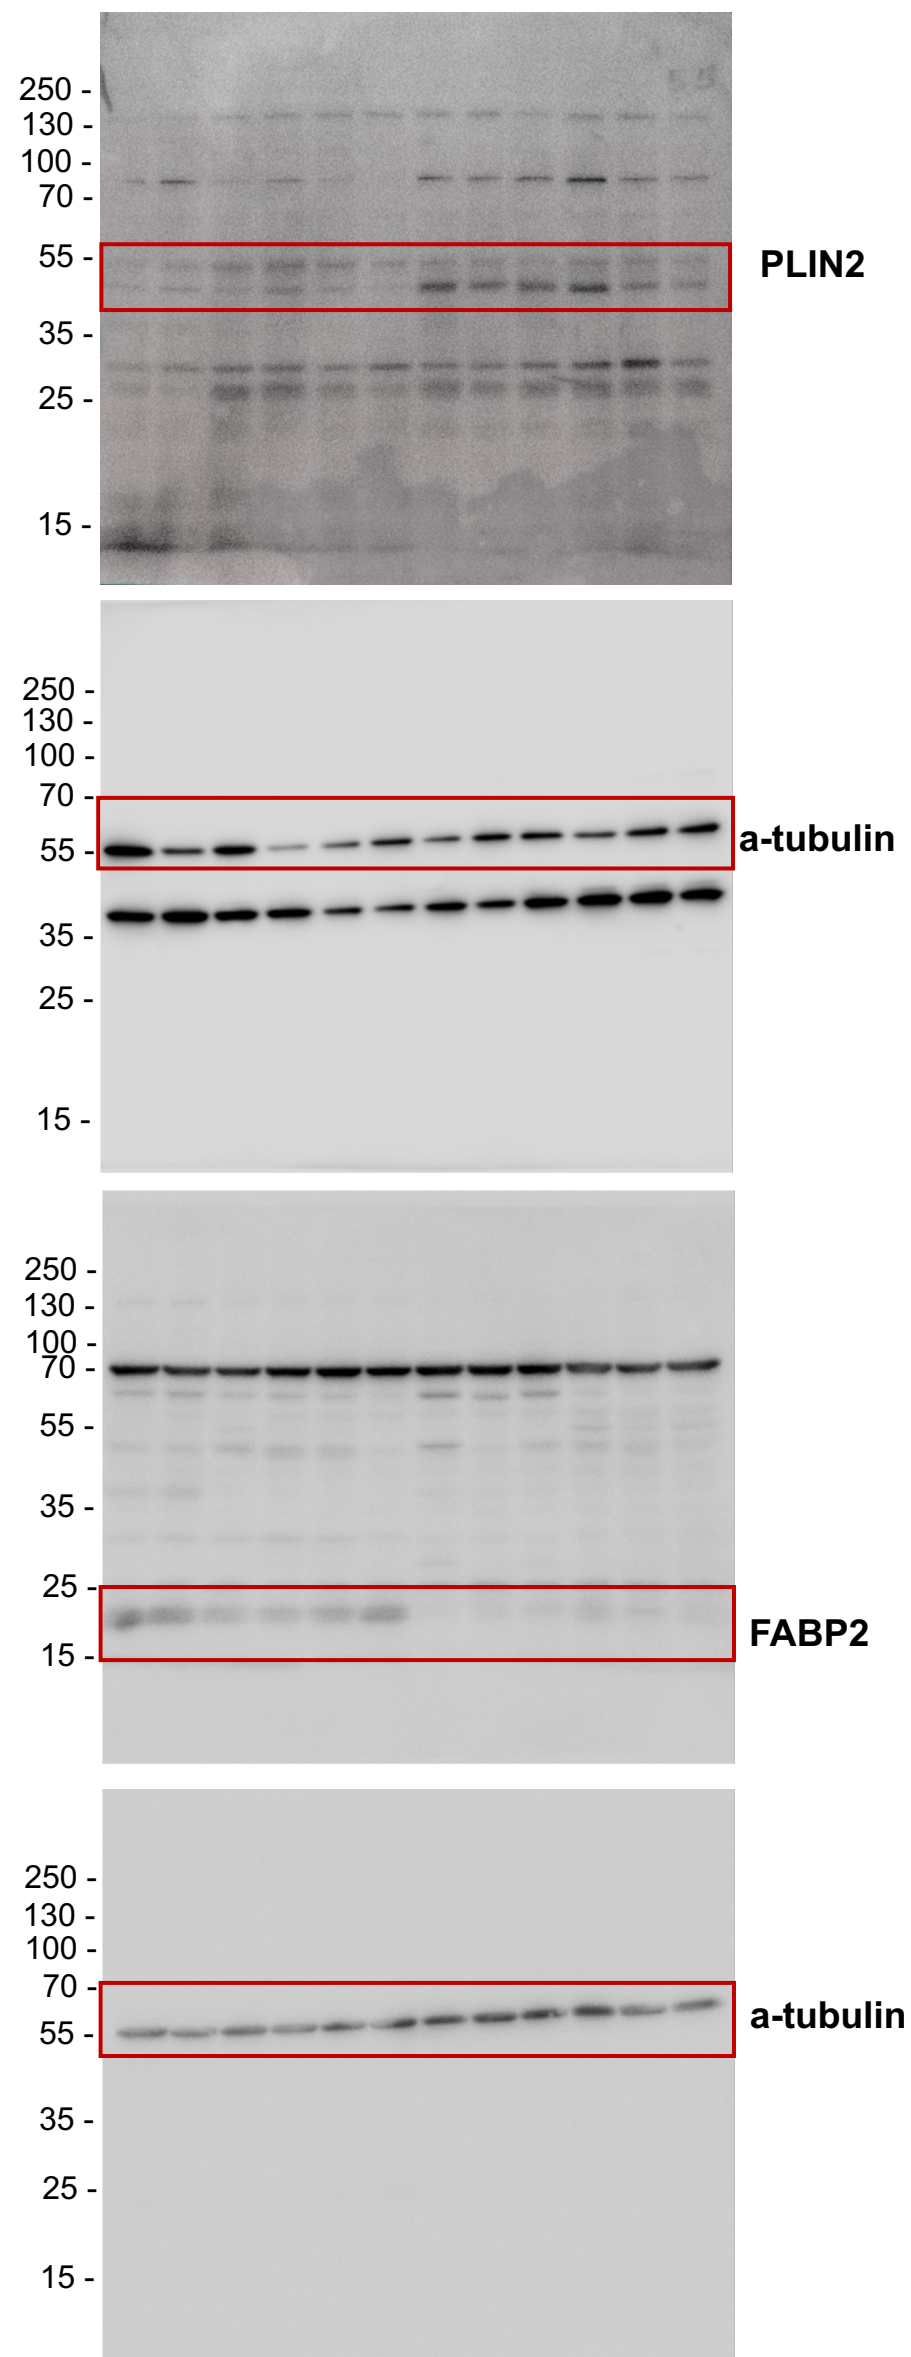

ED Figure 5b (continued)

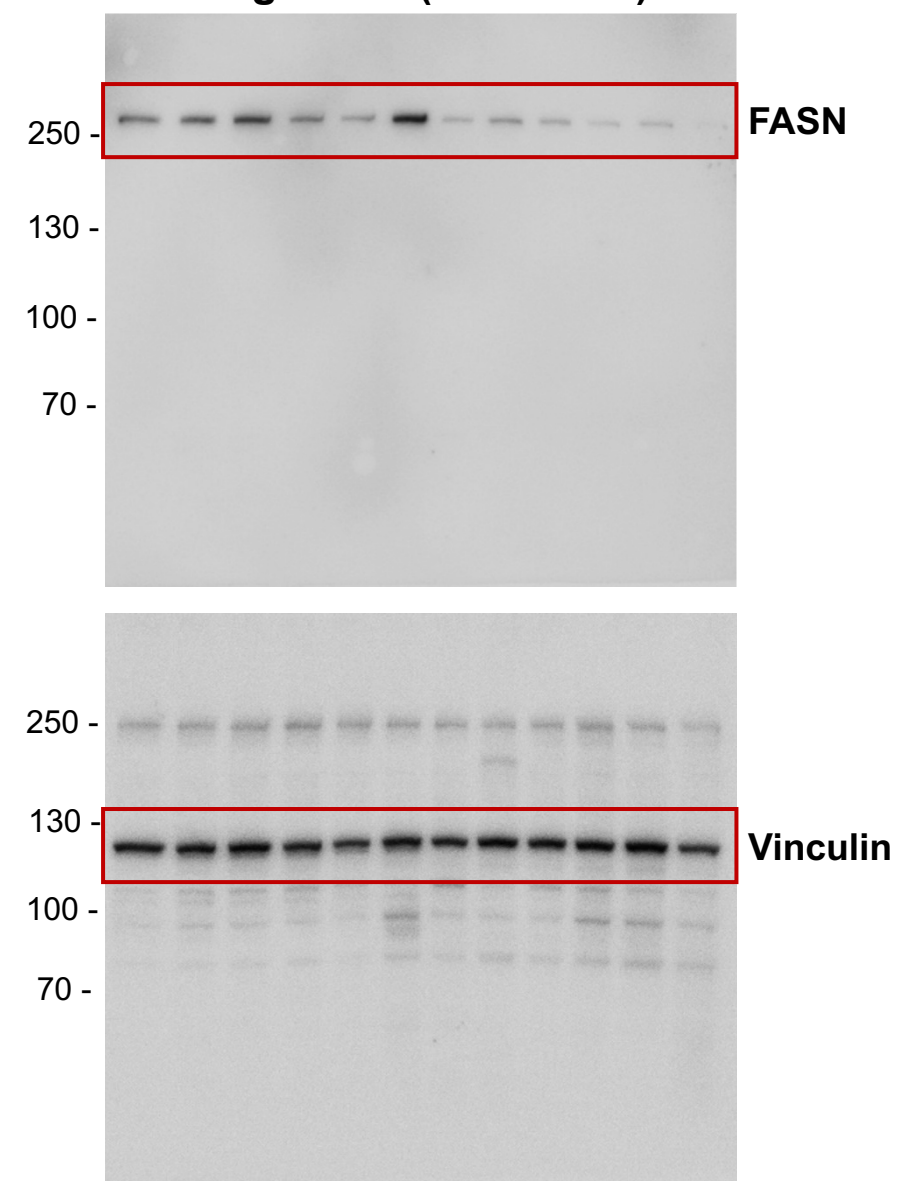

Supplementary Figure 1 (continued)

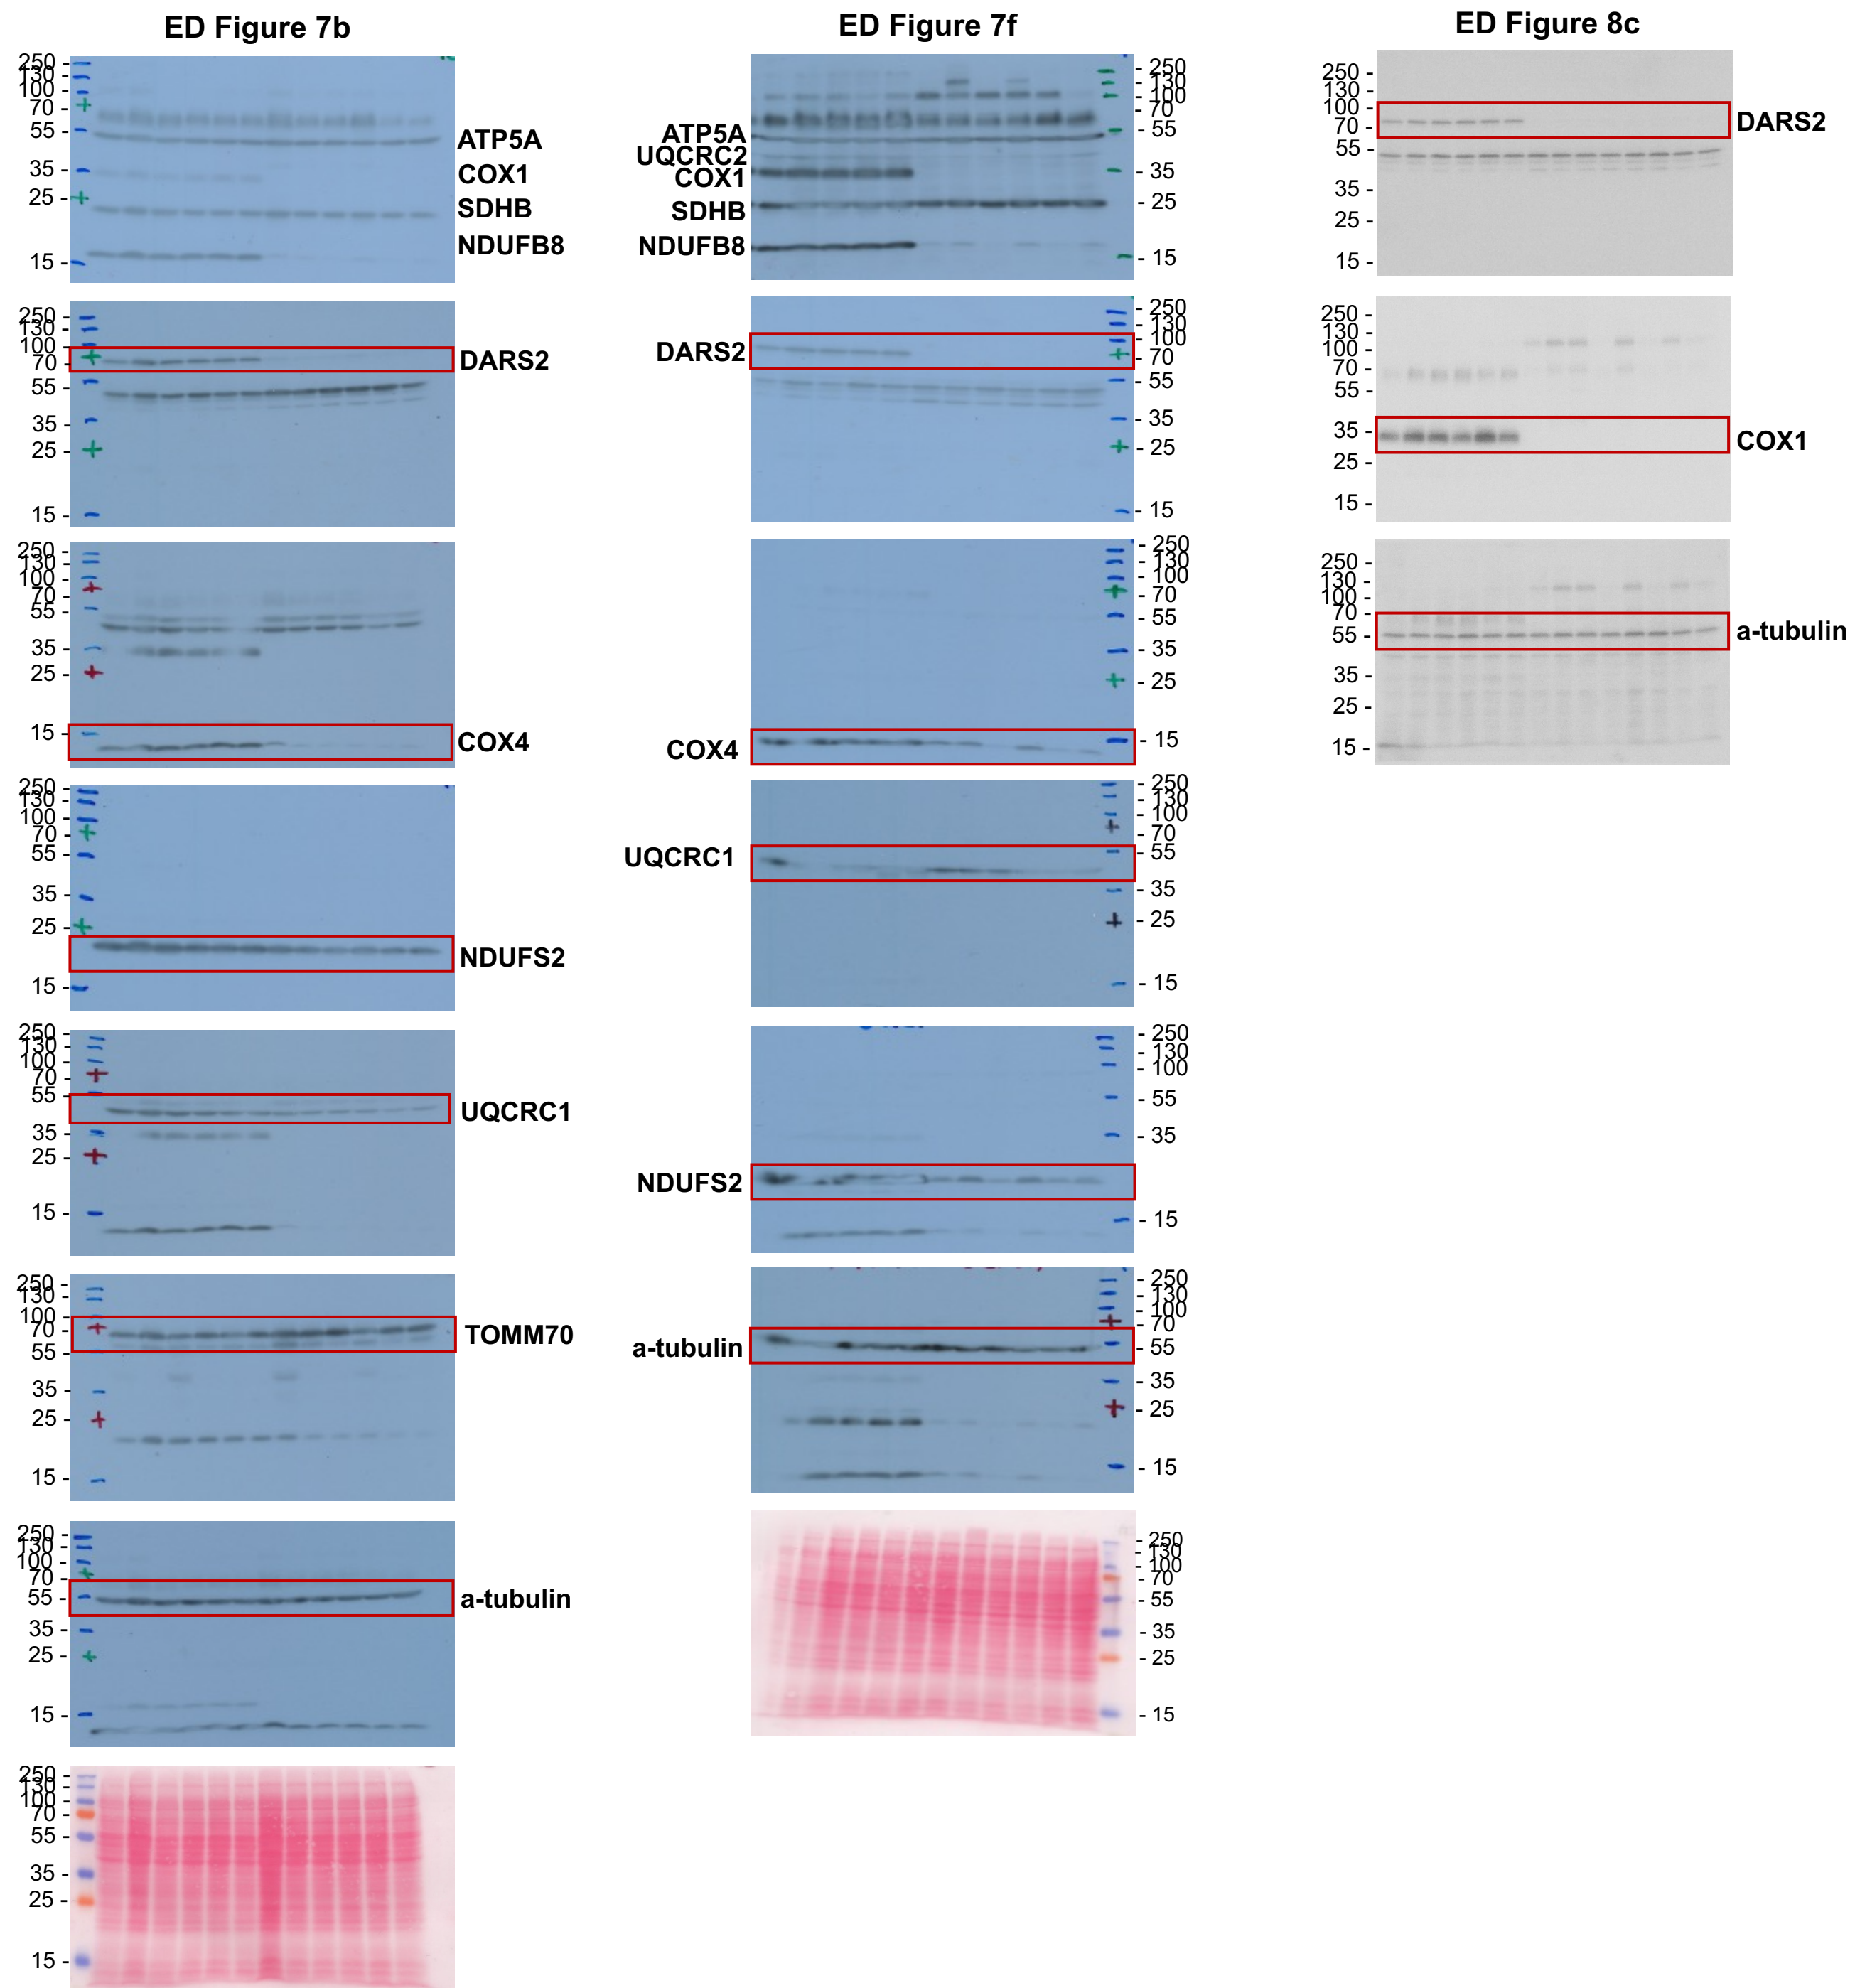

Supplementary Figure 1. Uncropped gels from immunoblots presented in the manuscript.

| Genotype                                                     | Age          | Whole Small intestine |         |      |       |     |     |     |       |     |     |      |       |  | Figure 1d,1f & Ext. Figure 1d,1e |
|--------------------------------------------------------------|--------------|-----------------------|---------|------|-------|-----|-----|-----|-------|-----|-----|------|-------|--|----------------------------------|
|                                                              |              | Stainings             |         |      |       |     |     |     |       |     |     |      |       |  |                                  |
|                                                              |              | H/E                   | COX/SDH | Ki67 | PLIN2 | ORO | ALP | PAS | OLFM4 | CC3 | CC8 | CD45 | F4/80 |  |                                  |
| <i>Dars2<sup>fl/fl</sup></i> or <i>Dars2<sup>fl/wt</sup></i> | 6-7 days-old | 17                    | 8       | 6    | 5     | 12  | 6   | 6   | 9     | 9   | 9   | 8    | 6     |  |                                  |
| DARS2 <sup>IEC-KO</sup>                                      |              | 19                    | 8       | 6    | 5     | 12  | 6   | 6   | 9     | 9   | 9   | 8    | 6     |  |                                  |

| Genotype                                                   | Age          | Proximal Small intestine |         |      |       |     |     | Ext. Figure 3d |
|------------------------------------------------------------|--------------|--------------------------|---------|------|-------|-----|-----|----------------|
|                                                            |              | Stainings                |         |      |       |     |     |                |
|                                                            |              | H/E                      | COX/SDH | Ki67 | PLIN2 | ORO | ALP |                |
| <i>Sdha<sup>fl/fl</sup></i> or <i>Sdha<sup>fl/wt</sup></i> | 6-7 days-old | 10                       | 5       | 5    | 5     | 8   |     |                |
| SDHA <sup>IEC-KO</sup>                                     |              | 11                       | 5       | 5    | 5     | 8   |     |                |

| Genotype                                                     | Age          | Proximal Small intestine |         |      |       |     |     | Ext. Figure 3i |
|--------------------------------------------------------------|--------------|--------------------------|---------|------|-------|-----|-----|----------------|
|                                                              |              | Stainings                |         |      |       |     |     |                |
|                                                              |              | H/E                      | COX/SDH | Ki67 | PLIN2 | ORO | ALP |                |
| <i>Cox10<sup>fl/fl</sup></i> or <i>Cox10<sup>fl/wt</sup></i> | 6-7 days-old | 7                        | 5       | 5    | 5     | 5   |     |                |
| COX10 <sup>IEC-KO</sup>                                      |              | 8                        | 5       | 5    | 5     | 5   |     |                |

| Genotype                     | Days after last tamoxifen injection | Proximal Small intestine |         |      |       |     |     |     |     |      |  | Figure 2d, 2e, Figure 3a (ORO), Ext. Figure 6b |
|------------------------------|-------------------------------------|--------------------------|---------|------|-------|-----|-----|-----|-----|------|--|------------------------------------------------|
|                              |                                     | Stainings                |         |      |       |     |     |     |     |      |  |                                                |
|                              |                                     | H/E                      | COX/SDH | Ki67 | PLIN2 | ORO | ALP | PAS | CC3 | CD45 |  |                                                |
| <i>Dars2<sup>fl/fl</sup></i> | 7d, 8d NCD                          | 31                       | 6       | 7    | 5     | 12  | 7   | 7   | 7   | 7    |  |                                                |
| DARS2 <sup>tamIEC-KO</sup>   |                                     | 31                       | 6       | 7    | 5     | 12  | 7   | 7   | 7   | 7    |  |                                                |

| Genotype                     | Days after last tamoxifen injection | Proximal Small intestine |         |      |       |     |     | Ext. Figure 7d |
|------------------------------|-------------------------------------|--------------------------|---------|------|-------|-----|-----|----------------|
|                              |                                     | Stainings                |         |      |       |     |     |                |
|                              |                                     | H/E                      | COX/SDH | Ki67 | PLIN2 | ORO | ALP |                |
| <i>Dars2<sup>fl/fl</sup></i> | 3d NCD                              | 6                        | 6       | 6    | 6     | 7   |     |                |
| DARS2 <sup>tamIEC-KO</sup>   |                                     | 6                        | 6       | 6    | 6     | 7   |     |                |

| Genotype                     | Days after last tamoxifen injection | Proximal Small intestine |         |      |       |     |     | Ext. Figure 7h |
|------------------------------|-------------------------------------|--------------------------|---------|------|-------|-----|-----|----------------|
|                              |                                     | Stainings                |         |      |       |     |     |                |
|                              |                                     | H/E                      | COX/SDH | Ki67 | PLIN2 | ORO | ALP |                |
| <i>Dars2<sup>fl/fl</sup></i> | 5d NCD                              | 10                       | 6       | 6    | 6     | 7   |     |                |
| DARS2 <sup>tamIEC-KO</sup>   |                                     | 11                       | 6       | 6    | 6     | 7   |     |                |

| Genotype                     | Days after last tamoxifen injection | Proximal Small intestine |         |      |       |     |     | Figure 3a |
|------------------------------|-------------------------------------|--------------------------|---------|------|-------|-----|-----|-----------|
|                              |                                     | Stainings                |         |      |       |     |     |           |
|                              |                                     | H/E                      | COX/SDH | Ki67 | PLIN2 | ORO | ALP |           |
| <i>Dars2<sup>fl/fl</sup></i> | 7d FFD                              | 32                       | 6       | 7    | 7     | 12  |     |           |
| DARS2 <sup>tamIEC-KO</sup>   |                                     | 32                       | 6       | 7    | 7     | 12  |     |           |

| Genotype                     | Days after last tamoxifen injection | Distal Small intestine |         |      |       |     |     |     |     |      |  | Figure 2e, Ext. Figure 6c, 6d |
|------------------------------|-------------------------------------|------------------------|---------|------|-------|-----|-----|-----|-----|------|--|-------------------------------|
|                              |                                     | Stainings              |         |      |       |     |     |     |     |      |  |                               |
|                              |                                     | H/E                    | COX/SDH | Ki67 | PLIN2 | ORO | ALP | PAS | CC3 | CD45 |  |                               |
| <i>Dars2<sup>fl/fl</sup></i> | 7d, 8d NCD                          | 31                     | 12      | 7    | 6     | 12  | 7   | 7   | 7   | 7    |  |                               |
| DARS2 <sup>tamIEC-KO</sup>   |                                     | 31                     | 12      | 7    | 6     | 12  | 7   | 7   | 7   | 7    |  |                               |

| Genotype                     | Days after last tamoxifen injection | Distal Small intestine |         |      |       |     |     | Ext. Figure 8d |
|------------------------------|-------------------------------------|------------------------|---------|------|-------|-----|-----|----------------|
|                              |                                     | Stainings              |         |      |       |     |     |                |
|                              |                                     | H/E                    | COX/SDH | Ki67 | PLIN2 | ORO | ALP |                |
| <i>Dars2<sup>fl/fl</sup></i> | 7d FFD                              | 32                     | 6       | 7    | 7     | 12  |     |                |
| DARS2 <sup>tamIEC-KO</sup>   |                                     | 32                     | 6       | 7    | 7     | 12  |     |                |

| Genotype                     | Days after last tamoxifen injection | Proximal Small intestine    |  |                       |  | Ext. Figure 10a, 10b, 10c |
|------------------------------|-------------------------------------|-----------------------------|--|-----------------------|--|---------------------------|
|                              |                                     | Stainings (IF)              |  |                       |  |                           |
|                              |                                     | TGN38/E-cadherin/PLIN2/DAPI |  | TGN38/E-cadherin/DAPI |  |                           |
| <i>Dars2<sup>fl/fl</sup></i> | 7d, 8d NCD                          | 12                          |  | 6                     |  |                           |
| DARS2 <sup>tamIEC-KO</sup>   |                                     | 12                          |  | 6                     |  |                           |

| Genotype                     | Days after last tamoxifen injection | Proximal Small intestine    |  |                       |  | Ext. Figure 10a, 10b |
|------------------------------|-------------------------------------|-----------------------------|--|-----------------------|--|----------------------|
|                              |                                     | Stainings (IF)              |  |                       |  |                      |
|                              |                                     | TGN38/E-cadherin/PLIN2/DAPI |  | TGN38/E-cadherin/DAPI |  |                      |
| <i>Dars2<sup>fl/fl</sup></i> | 3d NCD                              | 6                           |  | 6                     |  |                      |
| DARS2 <sup>tamIEC-KO</sup>   |                                     | 6                           |  | 6                     |  |                      |

| Genotype                     | Days after last tamoxifen injection | Proximal Small intestine    |  |                       |  | Figure 4d, Ext. Figure 10a |
|------------------------------|-------------------------------------|-----------------------------|--|-----------------------|--|----------------------------|
|                              |                                     | Stainings (IF)              |  |                       |  |                            |
|                              |                                     | TGN38/E-cadherin/PLIN2/DAPI |  | TGN38/E-cadherin/DAPI |  |                            |
| <i>Dars2<sup>fl/fl</sup></i> | 5d NCD                              | 6                           |  | 6                     |  |                            |
| DARS2 <sup>tamIEC-KO</sup>   |                                     | 6                           |  | 6                     |  |                            |

| Genotype                     | Days after last tamoxifen injection | Proximal Small intestine    |  |                       |  | Ext. Figure 10c |
|------------------------------|-------------------------------------|-----------------------------|--|-----------------------|--|-----------------|
|                              |                                     | Stainings (IF)              |  |                       |  |                 |
|                              |                                     | TGN38/E-cadherin/PLIN2/DAPI |  | TGN38/E-cadherin/DAPI |  |                 |
| <i>Dars2<sup>fl/fl</sup></i> | 7d FFD                              | 6                           |  |                       |  |                 |
| DARS2 <sup>tamIEC-KO</sup>   |                                     | 6                           |  |                       |  |                 |

| Genotype                     | Days after last tamoxifen injection | Distal Small intestine      |  | Ext. Figure 10b |
|------------------------------|-------------------------------------|-----------------------------|--|-----------------|
|                              |                                     | Stainings (IF)              |  |                 |
|                              |                                     | TGN38/E-cadherin/PLIN2/DAPI |  |                 |
| <i>Dars2<sup>fl/fl</sup></i> | 7d, 8d NCD                          | 6                           |  |                 |
| DARS2 <sup>tamIEC-KO</sup>   |                                     | 6                           |  |                 |

**Supplementary Table 4.** List of the genotypes and the numbers of mice for which histological sections were analyzed for each experimental group.

| <b>Name</b>    | <b>Forward (5' - 3')</b> | <b>Reverse (5' - 3')</b>    |
|----------------|--------------------------|-----------------------------|
| <i>Ppara</i>   | AACATCGAGTGTCGAATATGTGG  | CCGAATAGTTCGCCGAAAGAA       |
| <i>Scd1</i>    | GCTCTACACCTGCCTCTTC      | CCGTGCTTGTAAGTTCTG          |
| <i>Acc1</i>    | GACAGAGGAAGATGGCGTCC     | TACAACTTCTGCTCGCTGGG        |
| <i>Srepb1c</i> | CGCGGAAGCTGTCGGGGTAG     | AAATGTGCAATCCATGGCTCCGTGGTC |
| <i>Dgat1</i>   | GCCCCATGCGTGATTATT       | TCTGTCAGGGCACCCTACT         |
| <i>Acox1</i>   | TAACCTCCTCACTCGAAGCCA    | AGTTCCATGACCCATCTCTGTC      |
| <i>Mgat2</i>   | GTGTGGGATTAGGGGGACTT     | TCCCTGTTTGTCTTTGGTC         |
| <i>Mcad</i>    | AGGGTTTAGTTTTGAGTTGACGG  | CCCCGCTTTTGTCTATTCCG        |
| <i>Ehhadh</i>  | ATGGCTGAGTATCTGAGGCTG    | GGTCCAACTAGCTTTCTGGAG       |
| <i>Fasn</i>    | GGAGGTGGTGATAGCCGGTAT    | TGGGTAATCCATAGAGCCCAG       |
| <i>Pparg</i>   | CCTGAAGCTCCAAGAATACCA    | GCCTGATGCTTTATCCCCACA       |
| <i>Mttp</i>    | TGAGCGGCTATACAAGCTCAC    | CTGGAAGATGCTCTTCTCGC        |
| <i>Lipe</i>    | AGTGCCTATTCAGGGACAGA     | TGGGCGATGTGGTCTTTT          |
| <i>Mgat1</i>   | CTGGTTCTGTTTCCCGTTGT     | TGGGTCAAGGCCATCTTAAC        |
| <i>Gpat3</i>   | GTGCTGGGTGTCCTAGTGC      | AAGCTGATCCCAATGAAAGC        |
| <i>Acly</i>    | CAGTCCAAGTCCAAGATCC      | GTCTCGGGAGCAGACATAGT        |
| <i>Hadha</i>   | TGCATTTGCCGCAGCTTTAC     | GTTGGCCCAGATTTCTGTTCA       |
| <i>Acadvl</i>  | CTACTGTGCTTCAGGGACAAC    | CAAAGGACTTCGATTCTGCCC       |
| <i>Cd36</i>    | CTGTGGGCTCATTGCTGG       | CGCCACGTCATCTGGGTTT         |
| <i>Cpt2</i>    | CAGCACAGCATCGTACCCA      | TCCAATGCCGTTCTCAAAT         |
| <i>Atgl</i>    | GGATGGCGGCATTTTCAGACA    | CAAAGGGTTGGGTTGGTTCAG       |
| <i>Lpl</i>     | ACTCGCTCTCAGATGCCCTA     | TTGTGTTGCTTGCCATTCTC        |
| <i>Hprt1</i>   | GCCCCAAAATGGTTAAGGTT     | TTGCGCTCATCTTAGGCTTT        |

**Supplementary Table 5.** SYBR Green primer sequences used for quantitative RT-PCR.
